## **Temporal scaling of human scalp-recorded potentials**

Cameron D. Hassall, Jack Harley, Nils Kolling, and Laurence T. Hunt\*

Oxford Centre for Human Brain Activity, Wellcome Centre for Integrative

Neuroimaging, Department of Psychiatry, University of Oxford, Oxford OX3 7JX, United

Kingdom

\*[laurence.hunt@psych.ox.ac.uk](mailto:laurence.hunt@psych.ox.ac.uk)

## Abstract

Much of human behaviour is governed by common processes that unfold over varying timescales. Standard event-related potential analysis assumes *fixed-latency* responses relative to experimental events. However, recent single unit recordings in animals have revealed neural activity *scales* to span different durations during behaviours demanding flexible timing. Here, we employed a general linear modelling approach using a novel combination of fixed-duration and variable-duration regressors to unmix fixed-time and scaled-time components in human magneto/electroencephalography (M/EEG) data. We use this to reveal consistent temporal scaling of human scalp-recorded potentials across four independent EEG datasets, including interval perception, production, prediction and value-based decision making. Between-trial variation in the temporally scaled response predicts between-trial variation in subject reaction times, demonstrating the relevance of this temporally scaled signal for temporal variation in behaviour. Our results provide a general approach for studying flexibly timed behaviour in the human brain.

1           Action and perception in the real world require flexible timing. We can walk quickly  
2           or slowly, recognize the same piece of music played at different tempos, and form temporal  
3           expectations over long and short intervals. In many cognitive tasks, reaction time variability  
4           is modelled in terms of internal evidence accumulation [1], whereby the same dynamical  
5           process unfolds at different speeds on different trials.

6           Flexible timing is critical in our lives, yet despite several decades of research [2–5] its  
7           neural correlates remain subject to extensive debate. Due to their high temporal resolution,  
8           magnetoencephalography and electroencephalography (M/EEG) have played a particularly  
9           prominent role in understanding the neural basis of timing [5–13], and the method typically  
10          used to analyze such data has been the event-related potential (ERP), which averages event-  
11          locked responses across multiple repetitions. For example, this approach has been used to  
12          identify the presence of a slow negative-going signal during timed intervals. This signal,  
13          called the contingent negative variation (CNV) [14], is thought to be timing related because  
14          its slope depends inversely on the duration of the timed interval [7,8,12].

15          Crucially, the ERP analysis strategy implicitly assumes that neural activity occurs at  
16          *fixed-time* latencies with respect to experimental events. However, it has recently been shown  
17          that brain activity at the level of individual neurons can be best explained by a *temporal*  
18          *scaling* model [15,16], in which activity is explained by a single response that is stretched or  
19          compressed according to the length of the produced interval. When monkeys are cued to  
20          produce intervals of different lengths, the temporal scaling model explains the majority of  
21          variance in neural responses from medial frontal cortex (MFC) single units [15]. This  
22          suggests that one mechanism by which flexible motor timing can be achieved is by adjusting  
23          the speed of a common neural process, a perspective readily viewed through the lens of  
24          dynamical systems theory [16]. Consistent with the broad role played by dynamical systems  
25          in a range of neural computations [17,18], recent studies in neural populations have revealed

26 time-warping as a common property across many different population recordings and  
27 behavioural tasks [19]. For example, temporal scaling is also implicit in the neural correlates  
28 of evidence integration during sensory and value-based decision making [20] (which itself  
29 has also been proposed as a mechanism for time estimation in previous work [21]).

30       Successfully characterising scaled-time components in humans could open the door to  
31 studying the role of temporal scaling in more complex, hierarchical tasks such as music  
32 production or language perception, as well as in patient populations in which timing is  
33 impaired [22]. Yet it is currently unclear how temporal scaling of neural responses may  
34 manifest at the scalp (if at all) using non-invasive recording in humans. This is because of the  
35 fixed-time nature of the ERP analysis strategy. Again, one component of the ERP called the  
36 CNV has been found to ramp at different speeds for different temporal intervals [7,8,12],  
37 suggestive of temporal scaling. Crucially though, any scaled activity would appear mixed at  
38 the scalp with fixed-time components due to the *superposition problem* [23].

39       We therefore developed an approach to *unmix* scaled-time and fixed-time components  
40 in the EEG (Fig 1a). Our proposed method builds on recently developed least square  
41 regression-based approaches [24–29] that have proven useful in unmixing fixed-time  
42 components that overlap with one another, such as stimulus-related activity and response-  
43 related activity. To overcome the superposition problem, these approaches use a  
44 convolutional general linear model (GLM) to deconvolve neural responses that are  
45 potentially overlapping. Following this work, we estimate the fixed-time ERPs using a GLM  
46 in which the design matrix is filled with time-lagged ‘stick functions’ (a regressor which is  
47 valued 1 around the timepoint of interest, and 0 otherwise). Importantly, the stick functions  
48 can overlap in time to capture overlap in the underlying neural responses (Fig 1b), and the  
49 degree of fit to neural data can be improved by adding a regularisation penalty to the model

50 estimation [29]. In situations without any overlap, the GLM would exactly return the  
 51 conventional ERP.

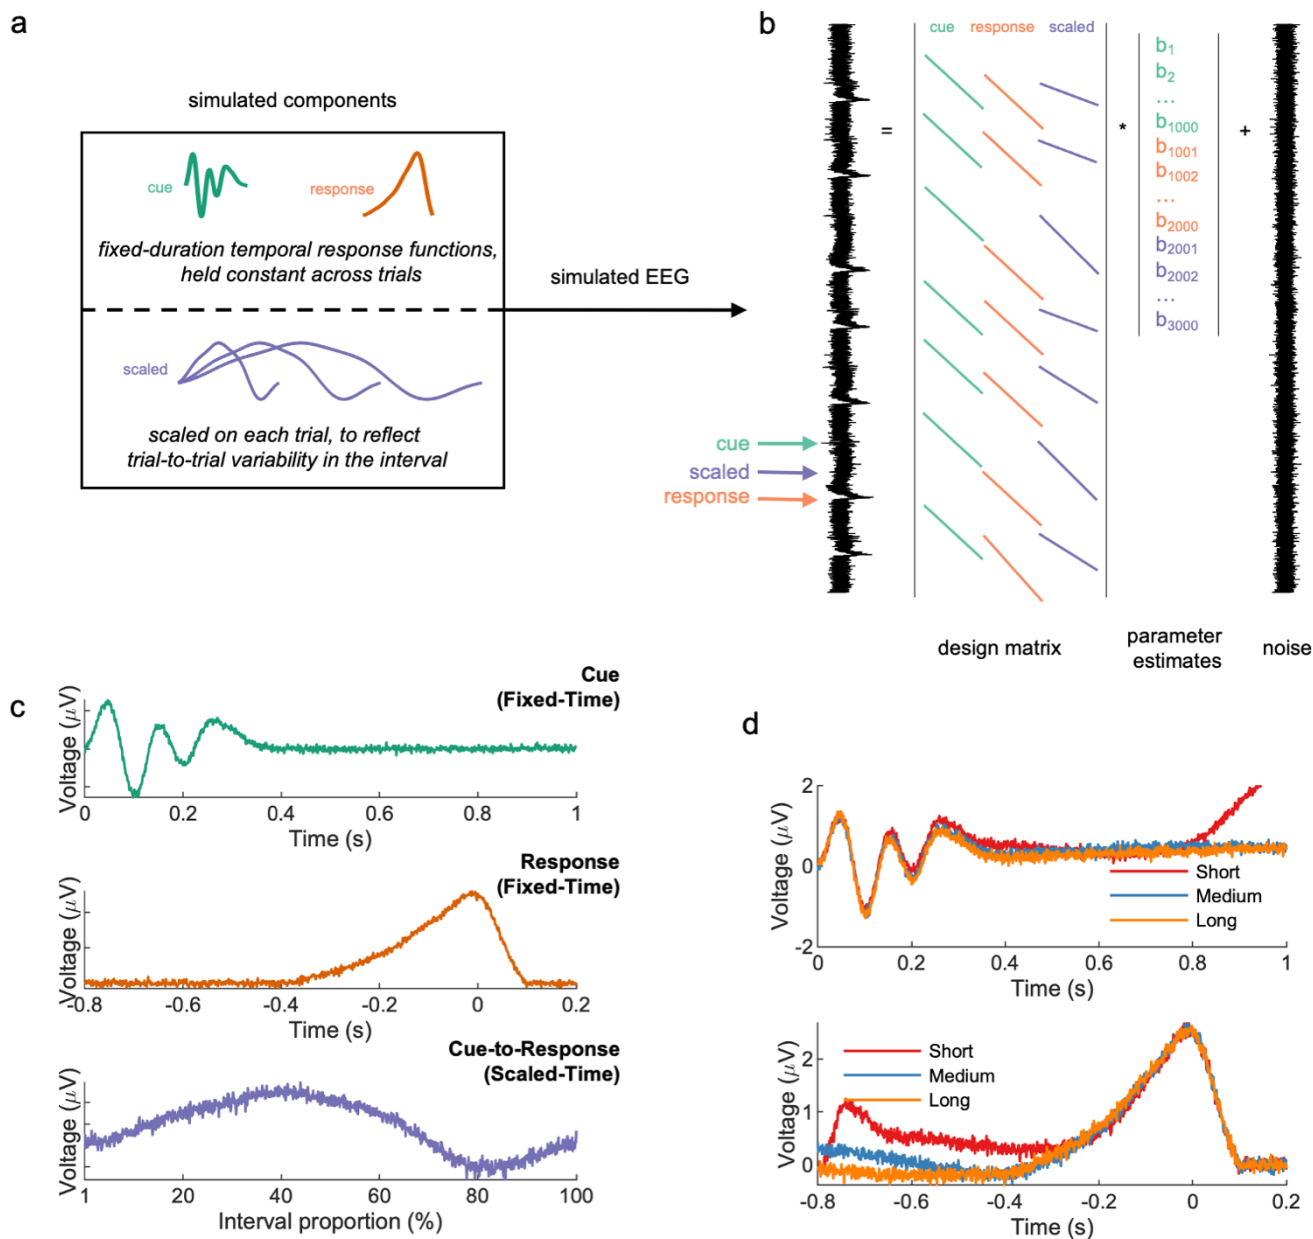

**Fig 1. Regression based unmixing of simulated data successfully recovers scaled-time and fixed-time components.** (a) EEG data were simulated by summing fixed-time components (cue and response), a scaled-time component with differing durations for different trials (short, medium, or long), and noise. (b) The simulated responses were unmixed via a GLM with stick basis functions: cue-locked, response-locked, and a single scaled-time basis spanning from cue to response (i.e., variable duration). (c) The GLM successfully recovered all three components, including the scaled-time component. (d) A conventional ERP analysis (cue-locked and response-locked averages) of the same data obscured the scaled-time component.

52 The key innovation that we introduce here is to allow for *variable-duration* regressors

53 in such models, in addition to fixed-duration regressors, to test for the presence of scaled-time

54 responses. In particular, we allow the duration of the stick function to vary depending upon  
55 the interval between stimulus and response, meaning that the same neural response can span  
56 different durations on different trials. Thus, rather than modelling the mean interval duration  
57 of each condition (e.g., via traditional ERPs), the proposed method captures trial-to-trial  
58 response variability. The returned scaled-time potential is no longer a function of real-world  
59 ('wall clock') time, but instead a function of the *percentage of time elapsed* between stimulus  
60 and response.

61 As a proof of concept, we simulated data at a single EEG sensor for an interval timing  
62 task, consisting of two *fixed-time components* (locked to cues and responses), and one *scaled-*  
63 *time component* spanning between cues and responses (Fig 1a). Our proposed method was  
64 successful in recovering all three components (Fig 1c), whereas a conventional ERP approach  
65 obscured the scaled-time component (Fig 1d). Crucially, in real EEG data we repeated this  
66 approach across all sensors, potentially revealing different scalp distributions (and hence  
67 different neural sources) for fixed-time versus scaled-time components.

68 By unmixing fixed and scaled components, our method goes beyond previous  
69 approaches for dealing with timing variability in EEG experiments. For example, the event-  
70 related timing of EEG trials can be aligned by translating either the entire waveform [30] or  
71 individual ERP components [31]. Trials can also be aligned by scaling EEG to a common  
72 time frame, e.g., through upsampling/downsampling [32] or dynamic time warping [33].  
73 Finally, the fixed-time effect of continuously varying stimuli (including fast/slow speech) on  
74 EEG can be quantified using the method of temporal response functions (TRFs), another  
75 regression-based approach [27,34–36]. Critically, unlike the proposed method, these methods  
76 either fail to quantify a scaled signal (translation-based methods and TRFs) or involve scaling  
77 but no unmixing.

78           We also note that a time-frequency decomposition might also readily separate the  
79 responses at higher and lower-frequencies. Indeed, a wide range of neural oscillations have  
80 been implicated in time perception [37]. One might reasonably expect stretched/compressed  
81 signals to manifest differently in the time-frequency domain, e.g., as they correlate more  
82 strongly with different stretched/compressed versions of the same wavelet function. Unlike  
83 our proposed approach, however, a time-frequency decomposition is not readily designed to  
84 look for temporal scaling of the scaled-time response, namely the *same* neural response  
85 unfolding over *different* timescales on different trials. Nor will a time-frequency  
86 decomposition separate fixed-time responses from scaled-time responses if the signals  
87 occupy the same frequency band [38].

88           We used our approach to analyze EEG recorded across four independent datasets,  
89 comprising three interval timing tasks and one decision-making task. In the first task,  
90 participants produced a target interval (short, medium, or long) following a cue (Fig 2a).  
91 Feedback was provided, and participants were able to closely match the target intervals. In  
92 the second, participants evaluated a computer-produced interval (Fig 2b). The closer the  
93 produced interval was to the target interval, the more likely participants were to judge the  
94 response as ‘on time’. In the third (previously analyzed [39,40]) task, participants made  
95 temporal predictions about upcoming events based on rhythmic predictions (Fig 2c).

96           In the fourth task (also previously analyzed [41,42]) participant chose between pairs  
97 of snack items (Fig 2d) – a process in which reaction time variability can be modelled as a  
98 process of internal evidence accumulation across time [43]. Neural activity related to  
99 evidence accumulation is measurable on the scalp as ramping activity that scales with  
100 decision difficulty. EEG for fast, easy trials increases at a faster rate compared to EEG for  
101 slow, difficult trials, indicating a higher rate of internal evidence accumulation [41]. Thus, we

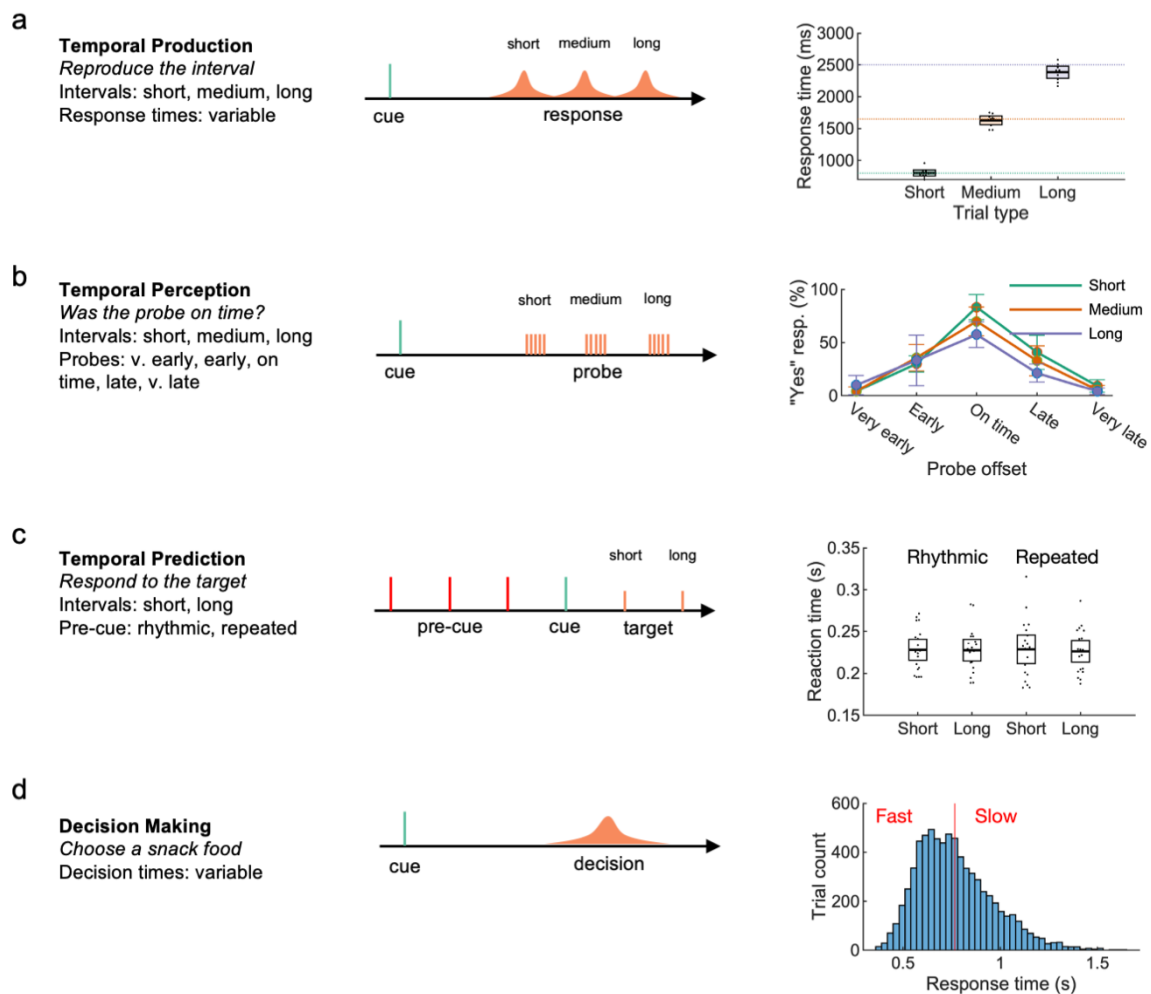

**Fig 2. Datasets from three time-estimation and one decision-making paradigm were analyzed.** In the temporal production task (a) participants successfully produced one of three cued intervals. In the temporal perception task (b) participants were able to properly judge a computer-produced interval. In a previously analyzed temporal prediction task<sup>11,12</sup>, participants responded quickly to targets following either a rhythmic or repeated (non-rhythmic) cue. In a previously analyzed decision-making task<sup>13,14</sup> participants were cued to choose one of two snack food items, resulting in a range of response times (mean shown as red line). Error bars represent 95% confidence intervals.

102 predicted that the EEG would contain an underlying scaled component associated with

103 different rates of evidence accumulation.

104 In all four tasks, we observed a scaled-time component that was distinct from the

105 preceding and following fixed-time components (Fig 3), which resembled conventional ERPs

106 (Supplementary Fig 3). Typically, ERP components are defined by their polarity and scalp

107 distribution [44]. The observed scaled-time components shared a common polarity (negative)

108 and scalp distribution (central). In each task, cluster-based permutation testing revealed that



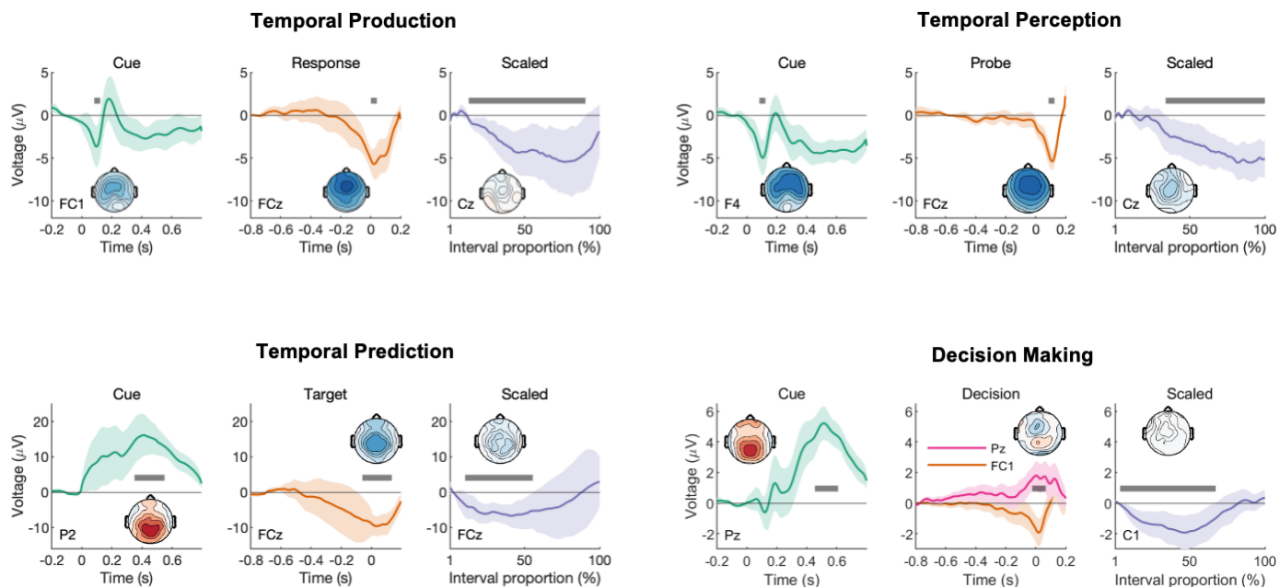

**Fig 3. Scaled-time components were consistently observed across all four paradigms, with distinct scalp topographies from fixed-time components.** Each had distinct fixed-time components relative to task-relevant events (left/middle columns), and a common negative scaled-time component over central electrodes, reflecting interval time (right column). The scalp topographies represent the mean voltage across the intervals indicated by the grey bars. For the fixed-time components, the intervals were chosen to visualize prominent deflections in the average waveform. For the scaled-time components, the intervals represent regions of significance as determined by cluster-based permutation tests. The error bars represent 95% confidence intervals.

109 the scaled-time component differed significantly from zero. The differences were driven by  
 110 clusters spanning 13-91% in the production task ( $p = .01$ ), 34-100% in the perception task ( $p$   
 111  $= .001$ ), 11-56% in the prediction task ( $p = .004$ ), and 4-68% in the decision-making task ( $p$   
 112  $= .01$ ). In many cases, scaled-time components were reliably observed at the single-subject  
 113 level (Supplementary Fig 5-8). To further validate our method, we quantified temporal  
 114 scaling by computing a ‘scaling index’ [15] for each task and participant (Fig 4). To calculate  
 115 this, we stretched/compressed each epoch to match the longest interval in each task, averaged  
 116 by condition, then calculated the coefficient of determination for predicting the longer  
 117 interval using stretched versions of the shorter intervals. We did this first on the raw data  
 118 (‘Original’), then separately for the data containing only the fixed-time components (‘Fixed-  
 119 only’, i.e., scaled-time components regressed out) and the scaled-time components (‘Scaled-  
 120 only’, i.e., fixed-time components regressed out). In three out of four tasks, the scaling index  
 121 for the scaled component exceeded the scaling index for the fixed component (production:

122  $t(9) = 3.79, p = .004$ , Cohen's  $d = 1.20$ ; perception:  $t(9) = 1.89, p = .09$ , Cohen's  $d = 0.60$ ;  
123 prediction:  $t(18) = 5.45, p < .001$ , Cohen's  $d = 1.27$ ; decision-making:  $t(17) = 5.45, p < .001$ ,  
124 Cohen's  $d = 1.29$ ).

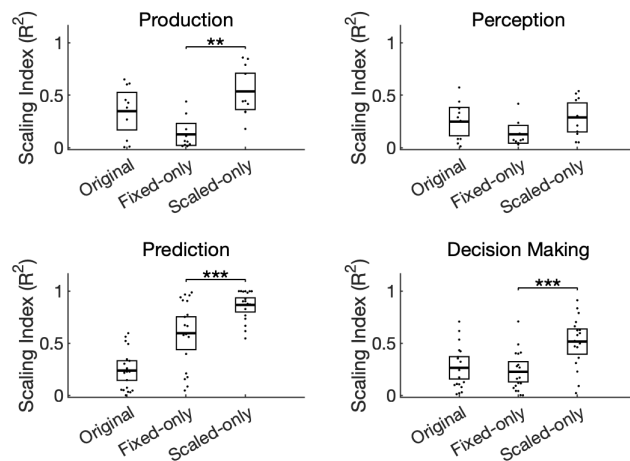

**Fig 4. The unmixed signals differed quantitatively in their degree of scaling.** The scaling index, a measure of similarity between epochs of differing duration, was greater for the scaled-time component compared to the fixed-time component. This result was replicated in three of the four tasks.

125 We then examined how the scaled-time component relates to behavioural variability:  
126 does the latency of the scaled-time component predict participants' response time? We  
127 focussed on the temporal production and decision-making tasks, in which the interval  
128 duration was equal to the response time. As response time varied from trial to trial, so did the  
129 modelled scaled component. To measure component latency, we applied an approach  
130 developed in [45,46], using principal component analysis (PCA) to model delay activity over  
131 central electrodes in the temporal production task.. The approach works by detecting latency  
132 shifts in a common underlying component [45,46]. Unlike simple peak detection, PCA can  
133 account for a range of waveform dynamics (e.g., multiple peaks). We first regressed out the  
134 fixed-time component as identified by the GLM, resulting in a dataset that consisted only of  
135 the residual scaled-time activity. We then computed the average scaled-time activity for each  
136 of the three interval conditions (Fig 5a-c). PCA was applied separately to each interval. This  
137 consistently revealed a first principal component that matched the shape of the scaled-time  
138 component and a second principal component that matched its *temporal derivative*. This

139 analysis confirms the presence of the scaled-time component in our data, as it is the first  
140 principal component of the residuals after removing fixed-time components. Crucially,  
141 adding or subtracting the second principal component captures variation in the *latency* of the  
142 scaled-time component (Supplementary Fig 4). Across response time quantiles, we found that  
143 PC2 scores (Supplementary Table 6) were significantly related to response times (Fig 5d),  
144  $F(2,18) = 8.31, p = .003, \eta_p^2 = 0.48, \eta_g^2 = 0.43$ ). This implies that the earlier in time that the  
145 scaled-time component peaked, the faster the subject would respond on that trial. This result  
146 was replicated in the decision-making task,  $F(2,34) = 43.60, p < .001, \eta_p^2 = 0.72, \eta_g^2 = 0.61$   
147 (Fig 5e).  
148

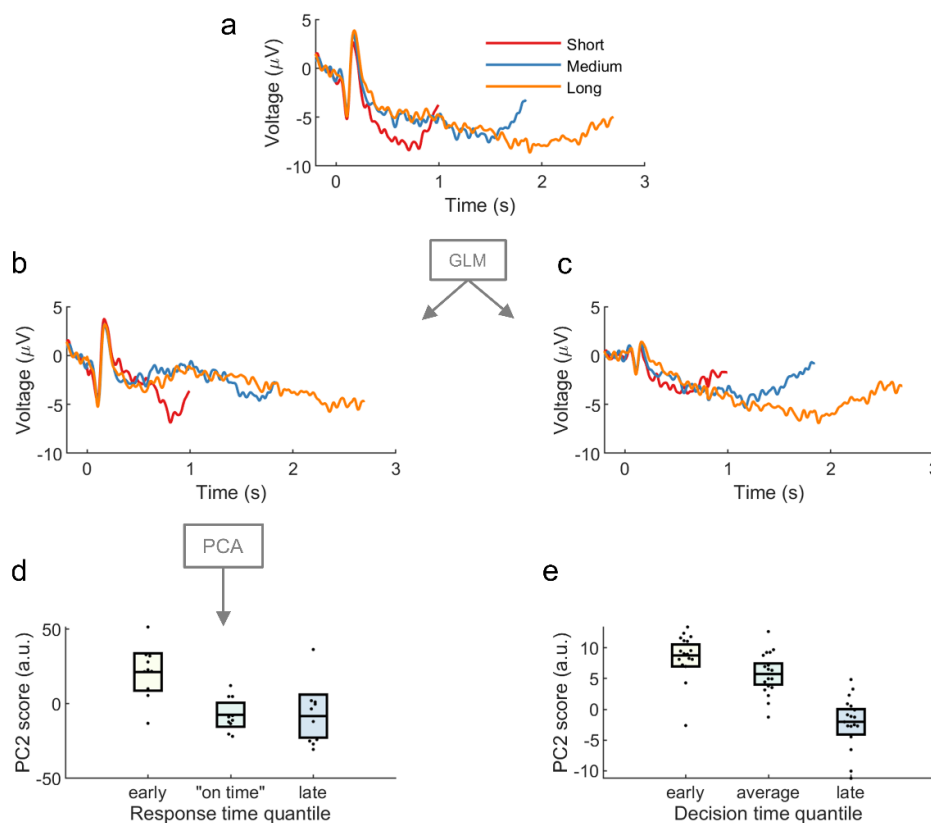

**Fig 5. Variation in scaled-time components predicts behavioural variation in time estimation.** Cue-locked EEG, shown as ERPs in (a), was analyzed via GLM. To visualize the unmixing of scaled-time and fixed-time components, the residual (noise) was recombined with either the scaled-time component (b) or the fixed-time components (c). PCA was run on the 'scaled-time plus residual' EEG. The second principal component resembled the temporal derivative or 'rate' of the scaled component (Supplementary Fig 5). (d) PC2 scores depended on response time, implying the scaled-time component peaked earlier for fast responses and later for slow responses. (e) The effect replicated in a decision-making task. Error bars represent 95% confidence intervals.

149

## Discussion

150 Our results provide a general method for recovering temporally scaled signals in  
151 human M/EEG, where scaled-time components are mixed at the scalp with conventional  
152 fixed-time ERPs. We focused here on tasks that have been widely used in the timing  
153 literature, namely interval production, perception, and prediction, as well as an example of a  
154 cognitive task that exhibits variable reaction times across trials (value-based decision  
155 making). Distinct scaled-time components and scalp topographies were revealed in all four  
156 tasks. These results suggest that flexible cognition relies on temporally scaled neural activity,  
157 as seen in recent animal work [15,16].

158 The existence of temporally scaled signals at the scalp may not be surprising to those  
159 familiar with the study of time perception. Because of its excellent temporal resolution, EEG  
160 has long been used to study delay activity in interval timing tasks. As discussed, one signal of  
161 interest has been a ramping frontal-central signal called the CNV, which we observed in our  
162 conventional ERP analysis (Supplementary Fig 3). Notably, CNV slope has been interpreted  
163 as an accumulation signal in pacemaker-accumulation models of timing [7,8,11,13]. Our  
164 work differs from these previous studies in one important respect. In a conventional ERP  
165 analysis, delay activity is assumed to occur over fixed latencies. The CNV is thus computed  
166 by averaging over many cue-locked EEG epochs of the same duration. In contrast, we have  
167 considered the possibility that scalped-recorded potentials reflect a mixture of both fixed-time  
168 and scaled-time components. By modelling fixed-time and scaled-time components  
169 separately, we revealed scaled activity that was common across all timed intervals. This, in  
170 turn, is consistent with a recent class of models of timing that propose time estimation reflects  
171 the variable speed over which an underlying dynamical system unfolds [16–18].

172 We also observed temporally scaled activity in a decision-making task, a somewhat  
173 surprising result given that the task did not have an explicit timing component (participants  
174 made simple binary decisions [41]). Nevertheless, time is the medium within which decisions

175 are made [47]. Computationally, the timing of binary decisions can be captured in a drift  
176 diffusion model as the accumulation of evidence in favour of each alternative [1]. This  
177 accumulation is thought to be indexed by an ERP component called the central parietal  
178 positivity (CPP) [48]. There is evidence that the slope of the CPP – which can be either  
179 stimulus-locked or response-locked – captures the rate of evidence accumulation [49]. For  
180 faster/easier decisions the CPP climbs more rapidly compared to slower/harder decisions  
181 [48,49]. Perhaps these effects can also be explained by stretching/compressing a common  
182 scaled-time component while holding stimulus- and response-related activity constant.  
183 Furthermore, variation in the scaled-time component is relevant to decision making according  
184 to our results: it predicts *when* a decision will be made. However, we also note that the  
185 topography observed in our scaled-time component was a negative-going potential rather  
186 than positive (Fig 3d). This can potentially be explained by the standard CPP-like ERP [41]  
187 being a mixture of our observed negative scaled-time topography with the positive fixed-time  
188 topographies.

189         Although our approach makes no assumptions about the overall shape of the scaled-  
190 time component, it does assume a consistent, linear scaling across intervals. This is an  
191 assumption that could be relaxed in a more complex model, e.g., using spline regression [25].  
192 We also note that although we made no a priori predictions about waveform shape, some  
193 between-task similarities and differences were noted in the resulting scaled-time components.  
194 For example, similar responses were seen in the tasks for which the interval of interest ended  
195 with a motor response (temporal production and decision making – see Fig 3a,d). In both  
196 cases, activity immediately preceding the response depended on a ramping, fixed-time,  
197 motor-related component, with little contribution from a scaled component. A similar  
198 observation was made in the temporal prediction task – activity just before the appearance of  
199 the target depended on anticipatory fixed-time activity, not scaled activity (Fig 3c). In

200 contrast, pre-probe activity in the temporal perception task showed almost no fixed-time  
201 activity, but a robust scaled-time component (Fig 3b). The reason for this difference cannot  
202 be identified by the current experiments, however. First, the perception and prediction tasks  
203 involved different tasks instructions ('listen for the probe' versus 'respond to the target').  
204 Second, the probe/target distributions differed in the two tasks; the mean duration was 75%  
205 likely in the prediction task, but only 20% likely in the perception task. We therefore  
206 speculate that scaled activity may be somewhat task dependent.

207 Our approach is not only conceptually different from previous work that models  
208 variability in timing using a regression framework [27,34–36], it is also a mechanistically  
209 important finding. It indicates the brain may support flexible timing by adapting the duration  
210 of an otherwise consistent neural response. This can be understood as varying the rate of a  
211 dynamical system [17,18] during interval estimation. Although there is evidence for such  
212 temporally scaled responses in the monkey neurophysiology literature (e.g., [15,16], which  
213 inspired the current study), we are not aware of any direct evidence in support of this idea in  
214 humans. Indeed, it goes against the dominant framework of fixed-latency responses that has  
215 thus far dominated M/EEG analysis.

216 Although we have focused here on interval timing and decision-making tasks, we  
217 anticipate other temporally-scaled EEG and MEG signals will be discovered for cognitive  
218 processes known to unfold over varying timescales. For example, the neural basis of flexible  
219 (fast/slow) speech production and perception is an active area of research [50–52], and may  
220 involve a form of temporal scaling [32]. Flexible timing is also important across a vast array  
221 of decision-making tasks, where evidence accumulation can proceed quickly or slowly  
222 depending on the strength of the evidence [20]. Flexible timing helps facilitate a range of  
223 adaptive behaviours via temporal attention [4], while disordered timing characterizes several

- 224 clinical disorders [53], underscoring the importance of characterising temporal scaling of
- 225 neural responses in human participants.

## **Acknowledgements**

This research was funded by a Natural Sciences and Engineering Research Council of Canada (NSERC: <https://www.nserc-crsng.gc.ca/>) Postdoctoral Fellowship to C.D.H. (PDF 546078 – 2020), a BBSRC (<https://bbsrc.ukri.org/>) AFL Fellowship (BB/R010803/1) to N.K., a Sir Henry Dale Fellowship from the Royal Society (<https://royalsociety.org>) and Wellcome (<https://wellcome.org/>) to L.T.H. (208789/Z/17/Z), a NARSAD Young Investigator Award from the Brain and Behavior Research Foundation (<https://www.bbrfoundation.org/>) to L.T.H., and supported by the NIHR Oxford Health Biomedical Research Centre (<https://oxfordhealthbrc.nihr.ac.uk/>). The Wellcome Centre for Integrative Neuroimaging was supported by core funding from Wellcome Trust (203139/Z/16/Z). For the purpose of Open Access, the author has applied a CC BY public copyright licence to any Author Accepted Manuscript version arising from this submission.

## **Author Contributions**

N.K. and L.T.H. conceived the experiments and methodology. C.D.H. and L.T.H. designed the experiments and developed the methodology. C.D.H. and J.H. performed the experiments (except for the prediction task, where data was downloaded from a previous publication [39,40]). C.D.H. and L.T.H. analyzed the data. C.D.H. and L.T.H. wrote the manuscript with input from the other authors.

## **Competing interests**

The authors declare no competing interests.

## **Additional information**

**Supplementary information** is available for this paper.

**Correspondence and requests for materials** should be addressed to L.T.H.



## 226 **Methods**

### 227 **Simulations**

228 We simulated cue-related and response-related EEG in a temporal production task  
229 using MATLAB 2020a (Mathworks, Natick, USA). Cue and response were separated by  
230 either a short, medium, or long interval. During the delay period, we simulated a scaled  
231 response that stretched or compressed to fill the interval. All three responses (cue, response,  
232 scaled) were summed together at appropriate lags (short, medium, or long), with noise – see  
233 Fig 1a. In total, we simulated 50 trials of each condition (short, medium, long).

234 To unmix fixed-time and scaled-time components, we used a regression-based  
235 approach [24,25,54] in which the continuous EEG at one sensor  $Y$  is modelled as a linear  
236 combination of the underlying event-related responses  $\beta$ , which are unknown initially. The  
237 model can be written in equation form as:

$$238 \quad Y = X\beta + \varepsilon$$

239 where  $X$  is the design matrix and  $\varepsilon$  is the residual EEG not accounted for by the  
240 model.  $X$  contains as many rows as EEG data points, and as many columns as predictors (that  
241 is, the number of points in the estimated event-related responses). In our case,  $X$  was  
242 populated by ‘stick functions’ – non-zero values around the time of the modelled events, and  
243 zeros otherwise. We included in  $X$  two fixed-time components, the cue and the response, as  
244 stick functions of fixed EEG duration (with variables set to 1). In other words, the height of  
245 the fixed-time stick function was constant across events of the same type and equal to its  
246 width. To model a temporally-scaled response, we used the MATLAB *imresize* function  
247 (Image Processing Toolbox, R2020b) with ‘box’ interpolation to stretch/compress a stick  
248 function so that it spanned the duration between cue and response (other interpolation  
249 methods were tried – see Supplementary Fig 1 – but this choice had little effect on the  
250 results). Thus, the duration of the scaled stick function varied from trial to trial (Fig 1b). The

251 goal here was to estimate a single scaled-time response to account for EEG activity across  
252 multiple varying delay periods. For the fixed-time responses, each column of  $X$  represents a  
253 latency in ms before/after an experimental event; by contrast, for the scaled-time responses,  
254 each column of  $X$  represents the *percentage* of time that has elapsed between *two* events  
255 (stimulus and response). Simulation code is available at  
256 <https://git.fmrib.ox.ac.uk/chassall/temporal-scaling>.

## 257 **Production and Perception Tasks**

### 258 *Participants*

259 Participants completed both the production and perception tasks within the same  
260 recording session. We tested ten university-aged participants, 5 male, 2 left-handed,  $M_{age} =$   
261 23.40, 95% CI [21.29, 25.51]. Participants had normal or corrected-to-normal vision and no  
262 known neurological impairments. Participants provided informed consent approved by the  
263 Medical Sciences Interdivisional Research Ethics Committee at the University of Oxford.  
264 Following the experiment, participants were compensated £20 (£10 per hour of participation)  
265 plus a mean performance bonus of £3.23, 95% CI [2.92, 3.55].

### 266 *Apparatus and Procedure*

267 Participants were seated approximately 64 cm from a 27-inch LCD display (144 Hz, 1  
268 ms response rate, 1920 by 1080 pixels, Acer XB270H, New Taipei City, Taiwan). Visual  
269 stimuli were presented using the Psychophysics Toolbox Extension [55,56] for MATLAB  
270 2014b (Mathworks, Natick, USA). Participants were given written and verbal instructions to  
271 minimize head and eye movements. The goal of the production task was to produce a target  
272 interval and the goal of the perception task was to judge whether or not a computer-produced  
273 interval was correct.

274 The experiment was blocked with ten trials per block. There were 18 production  
275 blocks and 18 perception blocks, completed in random order. Prior to each block, participants

276 listened to five isochronic tones indicating the target interval. Beeps were 400 Hz sine waves  
277 of duration 50 ms and an onset/offset ramping to a point 1/8 of the length of the wave (to  
278 avoid abrupt transitions). The target interval was either short (0.8 s), medium (1.65 s), or  
279 long (2.5 s).

280 In production trials, participants listened to a beep then waited the target time before  
281 responding. Feedback appeared after a 400-600 ms delay (uniform distribution) and remained  
282 on the display for 1000 ms. Feedback was a ‘quarter-to’ clockface to indicate ‘too early’, a  
283 ‘quarter-after’ clockface to indicate ‘too late’, or a checkmark to indicate an on-time  
284 response. Feedback itself was determined by where the participant’s response fell relative to a  
285 window around the target duration. The response window was initialized to +/- 100 ms  
286 around each target, then changed following each feedback via a staircase procedure:  
287 increased on each side by 10 ms following a correct response and decreased by 10 ms  
288 following an incorrect response (either too early or too late).

289 In perception trials, participants heard two beeps, then were asked to judge the  
290 correctness of the interval, that is, whether or not the test interval matched the target interval.  
291 Test intervals (very early, early, on time, late, very late) were set such that each subsequent  
292 interval was 25% longer than the previous (see Supplementary Table 1). Participants were  
293 then given feedback on their judgement – a checkmark for a correct judgement, or an ‘x’ for  
294 an incorrect judgement.

295 For each task, participants gained 2 points for each correct response and lost 1 point  
296 for each incorrect response. At the end of the experiment points were converted to a monetary  
297 bonus at a rate of £0.01 per point.

298 ***Data Collection***

299 In the perception task we recorded participant response time from cue, trial outcome  
300 (early, late, on time), and staircase- response window. In the production task, we recorded  
301 trial ‘on time’ judgements (yes/no), and trial outcome (correct/incorrect).

302 We recorded 36 channels of EEG, referenced to AFz. Data were recorded at 1000 Hz  
303 using a Synamps amplifier and CURRY 8 software (Compumetrics Neuroscan, Charlotte,  
304 USA). The electrodes were sintered Ag/AgCl (EasyCap, Herrsching, Germany). 31 of the  
305 electrodes were laid out according to the 10-20 system. Additional electrodes were placed on  
306 the left and right mastoids, on the outer canthi of the left and right eyes, and below the right  
307 eye. The reference electrode was placed at location AFz, and the ground electrode at Fpz.

### 308 **Prediction Task**

309 In this previously published [39,40] experiment, 19 participants responded to the  
310 onset of a visual target following a visual warning cue. The delay between cue and target was  
311 either short (700 ms) or long (1300 ms) and, in some conditions, congruent with a preceding  
312 stimulus stream. Only congruent trials were included in the current analysis (i.e., the ‘valid’  
313 trials in the ‘rhythmic’ and ‘repeated’ conditions). Each trial was preceded by a 500 ms  
314 fixation cross subtending  $0.6^\circ$  of visual angle. During the pre-cue period, participants were  
315 shown a flashing stimulus for 4-6 repetitions to indicate the target interval. The stimulus was  
316 a centrally presented black disc ( $1.2^\circ$ ) that appeared on the display for 100 ms. In the  
317 rhythmic condition the black disc appeared every 700 ms or 1300 ms (‘short’ or ‘long’). In  
318 the repeated condition, a red disc appeared either 700 ms or 1300 ms after the appearance of  
319 the black disc, followed by a variable delay period of either 1500-1900 ms (short) or 1900-  
320 2700 ms (long). Following the pre-cue period participants were then shown the warning cue,  
321 a white disc ( $1.2^\circ$ ) that appeared for 100 ms. After either a short or long delay (700 ms or  
322 1300 ms) the target appeared – a green  $1.2^\circ$  disc – for 100 ms, followed by the participant’s

323 response. The experimental program recorded the response time (time since the onset of the  
324 target). See Supplementary Fig 2c and [39,40] for more detail.

### 325 **Decision-Making Task**

326 In this experiment, also previously published [41,42], 18 participants were presented  
327 with two snack foods and asked to pick one. This was not an interval timing task and on  
328 average participants took 763 ms, 95% CI [713, 813], to respond. Trials began with the  
329 appearance of a centrally presented fixation cross (0.6°) for 2-4 s followed by the  
330 presentation of the snack items (3° across, in total). Participants were asked to indicate their  
331 preference by making a left or right button press within a 1.25 s window. The experimental  
332 program recorded the response time (time since the onset of the snack items). See  
333 Supplementary Fig 2d and [41] for more detail.

### 334 **Data Analysis**

#### 335 ***Behavioural data***

336 For the production task, we computed the mean produced interval for each participant.  
337 For the perception task, we computed mean likelihood of responding yes to the ‘on time’  
338 prompt, for each condition (short, medium, long) and interval (very early, early, on time, late,  
339 very late). For the prediction task, we computed the mean reaction time for each analyzed  
340 condition (rhythmic, repeated) and interval (short, long). For the decision-making task, we  
341 computed the mean response (decision) time. See Fig 2 and Supplementary Tables 2-4 for  
342 behavioural results.

#### 343 ***EEG Preprocessing***

344 For all three timing tasks, EEG was preprocessed in MATLAB 2020b (Mathworks,  
345 Natick, USA) using EEGLAB [57]. We first down-sampled the EEG to 200 Hz, then applied  
346 a 0.1-20 Hz bandpass filter and 50 Hz notch filter. The EEG was then re-referenced to the  
347 average of the left and right mastoids (and AFz recovered in the production/perception tasks).

348 Ocular artifacts were removed using independent component analysis (ICA). The ICA was  
349 trained on 3-second epochs of data following the appearance of the fixation cross at the  
350 beginning of each trial. Ocular components were identified using the *iclabeled* function and  
351 then removed from the continuous data.

352 EEG for the decision-making task was already preprocessed prior to our analysis. This  
353 was a simultaneous EEG-fMRI recording, and preprocessing included the removal of MR-  
354 related artifacts via filtering and principal component analysis, as well as a 0.5-40 Hz  
355 bandpass filter. In line with our other analyses, we re-referenced the EEG to the average of  
356 TP7 and TP8 (located close to the mastoids) and applied an additional 20 Hz low-pass filter.

### 357 ***ERPs***

358 To construct conventional event-related potentials (ERPs), we first created epochs of  
359 EEG around cues (all tasks), responses (perception task), probes (production task), targets  
360 (prediction task), and decisions (decision-making task). Cue-locked ERPs extended from 200  
361 ms pre-cue to either 800, 1650, or 2500 ms post-cue (the short, medium, and long targets) in  
362 the perception/production tasks, 700 or 1300 ms in the prediction task (the short and long  
363 targets), and 600 ms in the decision-making task. Epochs were baseline-corrected using a 200  
364 ms pre-cue window. We also constructed epochs from 800, 1650, or 2500 ms prior to the  
365 response/probe in the production/perception tasks, 700 or 1300 ms prior to the target in the  
366 prediction task, and 600 prior to the decision in the decision-making task to 200 ms after the  
367 response/probe/target/decision. A baseline was defined around the event of interest (mean  
368 EEG from -20 to 20 ms) and removed in all cases except for the decision-making task, in line  
369 with the original analysis [41]. We then removed any trials in which the sample-to-sample  
370 voltage differed by more than 50  $\mu\text{V}$  or the voltage change across the entire epoch exceeded  
371 150  $\mu\text{V}$ . We then created conditional cue and response/probe/target/decision averages for  
372 each participant and task: production/perception (short, medium, and long), prediction (short

373 and long), and decision-making (early and late, via a median split [41]). Finally, participant  
374 averages in the timing tasks were combined into grand-average waveforms at electrode FCz,  
375 a location where timing-related activity has been previously observed [5] and Pz in the  
376 decision-making task, in line with the previously published analysis [41] (Supplementary Fig  
377 3).

### 378 *rERPs*

379 To unmix fixed-time and scaled-time components in our EEG data, we estimated  
380 regression-ERPs (rERPs) following the same GLM procedure we used with our simulated  
381 data, but now applied to each sensor. We used a design matrix consisting of a regular stick  
382 functions for cue and response/probe/target and a stretched/compressed stick function  
383 spanning the interval from cue to response/probe/target/decision. In particular, we estimated  
384 cue-locked responses that spanned from 200 ms pre-cue to 800 ms post-cue. The  
385 response/probe/target/decision response interval spanned from -800 to 200 ms. Each fixed-  
386 time response thus spanned 1000 ms, or 200 EEG sample points. The scaled-time component,  
387 as described earlier, was modelled as a single underlying component (set width in  $X$ ) that  
388 spanned over multiple EEG durations (varying number of rows in  $X$ ). Thus, our method  
389 required choosing how many scaled-time sample points to estimate (the width in  $X$ ). For the  
390 production/perception tasks, we chose to estimate 330 scaled-time points, equivalent to the  
391 duration of the ‘medium’ interval. For the prediction task, we chose to estimate 200 scaled-  
392 time points, equivalent to the mean of the short and long conditions (700 ms, 1300 ms). For  
393 the decision-making task, we estimated 153 scaled-time points (roughly equivalent to the  
394 mean decision time). Unlike the conventional ERP approach, this analysis was conducted on  
395 the continuous EEG. To identify artifacts in the continuous EEG, we used the *basicrap*  
396 function from the ERPLAB [58] toolbox with a 150  $\mu$ V threshold (2000 ms window, 1000  
397 ms step size). A sample was flagged if it was ‘bad’ for any channel. Flagged samples were

398 excluded from the GLM (samples removed from the EEG and rows removed from the design  
399 matrix). Additionally, we removed samples/rows associated with unusually fast or slow  
400 responses in the production task (less than 0.2 s or more than 5 s). On average, we removed  
401 2.17 % of samples in the production task (95% CI [1.49, 2.86]), 3.75 % of samples in the  
402 perception task (95% CI [2.39, 5.10]), 1.03% of samples in the prediction task (95% CI [0.95,  
403 1.10]), and 5.56% of samples in the decision-making task (95% CI [4.99, 6.12]).

404 To test for multicollinearity between the regressors we computed the variance  
405 inflation factor (VIF) for each regressor, i.e., at each timepoint in the estimated waveforms.  
406 This was done using the *uf\_vif* function in the Unfold toolbox [25]. We were concerned about  
407 multicollinearity because the fixed-time and scaled-time components occurred over the same  
408 ‘real time’ durations. For example, in the production task the early and later parts of the  
409 scaled waveform always coincided with the start of the cue-locked and end of the response-  
410 locked responses, respectively. The overlap was not consistent, however; alignment between  
411 the fixed and scaled regressors was lessened due to distortions in the scaled stick function  
412 (see Supplementary Fig 1). As a result, the VIF was low ( $< 10$ ) at nearly all points other than  
413 the start/end (Supplementary Fig 9). This was true in all tasks except for the temporal  
414 prediction task (VIFs  $> 10$ ), as these tasks incorporated greater temporal variability across  
415 trials. We therefore expected the waveform estimates in the temporal prediction task to be  
416 noisier relative to the other tasks. We note that future studies could use VIF to evaluate the  
417 likelihood of successfully unmixing fixed-time and scaled-time components. Introducing  
418 elements of experimental design (such as increased interval variability across trials) could  
419 help to address concerns over multicollinearity.

420 To lessen the effect of multicollinearity and impose a smoothness constraint on our  
421 estimates, we used a first-derivative form of Tikhonov regularization [29]. Tikhonov  
422 regularization reframes the GLM solution as the minimization of:



423 
$$\|X\beta - Y\|^2 + \lambda\|L\beta\|^2$$

424 where  $L$  is the regularization operator and  $\lambda$  is the regularization parameter. In other  
425 words, we aimed to minimize a penalty term in addition to the usual residual. This has the  
426 solution

427 
$$(X^T X + \lambda L)^{-1} X^T Y$$

428 In our case,  $L$  approximated the first derivative as a scaled finite difference[59]:

429 
$$L = \frac{1}{2} \begin{bmatrix} 1 & -1 & 0 & \dots & 0 & 0 \\ 0 & 1 & -1 & \dots & 0 & 0 \\ \dots & \dots & \dots & \dots & \dots & \dots \\ 0 & 0 & 0 & \dots & 1 & -1 \end{bmatrix}$$

430 We then chose regularization parameters for each participant using 10-fold cross  
431 validation. Our goal here was to minimize the mean-squared error of the residual EEG at  
432 electrode FCz, our electrode of interest. The following  $\lambda$ s were tested on each fold: 0.001,  
433 0.01, 0, 1, 10, 100, 1000, 10000, 100000. An optimal  $\lambda$  was chosen for each participant  
434 corresponding to the parameter with the lowest mean mean-squared error across all folds. See  
435 Supplementary Table 7 for a summary.

### 436 ***Statistics***

437 We quantified the amplitude of the scaled-time component in two ways. First, we  
438 computed and plotted the 95% confidence interval at each ‘timepoint’ of the scaled-time  
439 signal (right column of Fig 3). Next, we conducted a nonparametric statistical test of the  
440 scaled-time component according to the procedure outlined in [60]. After computing a single-  
441 sample  $t$ -statistic at each sample point, we identified clusters of points for which the  $t$ -value  
442 exceeded a critical threshold corresponding to an alpha level of .05 (i.e., the 2.5<sup>th</sup> and 97.5<sup>th</sup>  
443 percentiles, making this a two-sided test). For each cluster, we computed the ‘cluster mass’,  
444 defined as the sum of the absolute values of the  $t$ -values within the cluster. To determine  
445 whether the observed cluster masses exceeded what could occur by chance, we permuted the  
446 scaled components by randomly flipping (multiplying by -1) the entire waveform. We then

447 computed the cluster masses for the permuted waveforms as before, and recorded the  
448 maximum cluster mass (or zero if there were no clusters). Every possible permutation was  
449 checked for the production and perception tasks ( $2^{10} = 1024$  permutations). For the prediction  
450 and decision-making tasks, 1000 random permutations were checked. We then labelled our  
451 observed cluster masses as ‘significant’ if they exceeded 95% of the maximum cluster masses  
452 of the permuted waveforms. These analyses were done at the scalp location where the mean  
453 scaled-time signal reached its most negative value, i.e. electrode Cz in the  
454 production/perception tasks, FCz in the prediction task, and C1 in the decision-making task.

### 455 *Scaling Index*

456 To validate the unmixing procedure, we regressed out either the scaled-time  
457 component or the fixed-time components from the EEG in each task and participant to create  
458 ‘fixed-only’ or ‘scaled-only’ data sets. We then quantified the amount of temporal scaling  
459 present in each task, participant, and data set (original, fixed-only, scaled only) using a  
460 similar procedure as [15]. Specifically, we constructed epochs spanning the intervals of  
461 interest (e.g., cue to response), then stretched or compressed each epoch to match a common  
462 duration (the longest duration in the interval timing tasks; the mean of the ‘late’ responses in  
463 the decision-making task, as defined above). For each task and participant, we averaged by  
464 condition (e.g., short, medium, long) to create conditional ERPs with a common duration,  
465 then computed a scaling index defined as the coefficient of determination. Specifically, we  
466 asked how well the ‘long’ waveform could be predicted by the ‘short’ waveform. If there was  
467 also a ‘medium’ waveform (the production/perception tasks) another coefficient of  
468 determination was computed, and the two coefficients were averaged. A larger scaling index  
469 can therefore be interpreted as a greater post-scaling similarity between conditions. Scaling  
470 indices in the fixed-only and scaled-only data sets were compared via paired-samples *t*-tests.  
471 For each *t*-test, we computed Cohen’s *d* as:

472 
$$Cohen's\ d = \frac{M_{diff}}{S_{diff}}$$

473 where  $M_{diff}$  is the mean difference between the scores being compared and  $S_{diff}$  is the  
474 standard deviation of the difference of the scores being compared [61]. Interestingly, the  
475 scaling index of the original signal appeared to be a mixture of the scaling indices of the  
476 fixed-only and scaled-only signals in all tasks except for the temporal prediction task (Fig 4).  
477 We interpreted this as further evidence that the unmixing procedure was less effective here  
478 due to multicollinearity.

### 479 **PCA**

480 To explore the link between the scaled-time component and behaviour, we examined  
481 the scaled-only data set described above – that is, the scaled-time regressors plus residuals.  
482 Only mid-frontal electrodes were considered: FC1, FCz, FC2, Cz, CP1, CPz, and CP2. We  
483 then constructed epochs starting at the cue and ending at the target interval (800 ms, 1650 ms,  
484 or 2500 ms). Epochs within each condition (short, medium, long) were further grouped into  
485 three equal-sized response-time bins (early, on time, late) and averaged for each electrode  
486 and participant. We then conducted a PCA for each condition (short, medium, long) and  
487 participant. See Supplementary Table 5 for amount of variance explained by PC1 and PC2.  
488 To visualize the effect of PC2, we computed the mean PC2 across all participants. We then  
489 added more or less of the mean PC2 to the mean PC1 projection and applied a 25-point  
490 moving-mean window for visualization purposes (Supplementary Fig 4). In order to choose a  
491 reasonable range of PC2 scores, we examined the average minimum and maximum PC2  
492 score for each participant and condition (short, medium, long). The PC2 score ranges were -  
493 21 to 15 (short), -41 to 38 (medium), and -40 to 55 (long). To assess the relationship between  
494 PC2 score and behaviour, we binned PC2 scores according to our response time bins (early,  
495 on time, late) and collapsed across conditions (short, medium, long). This gave us a single  
496 mean PC2 score for each participant and response time bin (early, on time, late), which we

497 analyzed using a two-sided repeated-measures ANOVA (Fig 5d) after verifying the  
498 assumption of normality using the Shapiro-Wilk test. Two different effect sizes,  $\eta_p^2$  and  $\eta_g^2$ ,  
499 were computed, according to:

$$500 \quad \eta_p^2 = \frac{SS_Q}{SS_Q + SS_{SQ}} \quad \eta_g^2 = \frac{SS_Q}{SS_Q + SS_S + SS_{SQ}}$$

501 where  $SS_Q$  is the sum of squares of the quantile effect (early, on time, late),  $SS_{SQ}$  is the error  
502 sum of squares of the quantile effect, and  $SS_S$  is the sum of squares between subjects [62].

503 We then replicated the PCA procedure for the decision-making task using an epoch  
504 extending 800 ms from the cue at a central electrode cluster (FC3, FC1, FC2, FC4, C3, C1,  
505 Cz, C2, C4, CP3, CP1, CP2, CP4, P3, P1, Pz, P2, and P4). Note that the assumption of  
506 normality was violated for 'early' responses in the decision-making task. However, as  
507 repeated-measures ANOVA is robust to violations of normality, no statistical correction was  
508 made.

### 509 **Data Availability**

510 Raw and preprocessed EEG for the production and perception tasks will be made  
511 publicly available at the time of publication. Raw data for the prediction task is available at  
512 <https://doi.org/10.5061/dryad.5vb8h>. Raw data for the decision-making task is available at  
513 <https://openneuro.org/datasets/ds002734/versions/1.0.2>.

### 514 **Code Availability**

515 Simulation and analysis scripts are available at [https://git.fmrib.ox.ac.uk/chassall/temporal-](https://git.fmrib.ox.ac.uk/chassall/temporal-scaling)  
516 [scaling](https://git.fmrib.ox.ac.uk/chassall/temporal-scaling).

## References

- 517 1. Bogacz R, Brown E, Moehlis J, Holmes P, Cohen JD. The Physics of Optimal Decision  
518 Making: A Formal Analysis of Models of Performance in Two-Alternative Forced-Choice  
519 Tasks. *Psychological Review*. 113: 700–765.
- 520 2. Merchant H, Harrington DL, Meck WH. Neural Basis of the Perception and Estimation of  
521 Time. *Annu Rev Neurosci*. 2013;36: 313–336. doi:10.1146/annurev-neuro-062012-  
522 170349
- 523 3. Wittmann M. The inner sense of time: how the brain creates a representation of  
524 duration. *Nature Reviews Neuroscience*. 2013;14: 217–223. doi:10.1038/nrn3452
- 525 4. Nobre AC, van Ede F. Anticipated moments: temporal structure in attention. *Nature*  
526 *Reviews Neuroscience*. 2018;19: 34–48. doi:10.1038/nrn.2017.141
- 527 5. Macar F, Vidal F. Event-Related Potentials as Indices of Time Processing: A Review.  
528 *Journal of Psychophysiology*. 2004;18: 89–104. doi:10.1027/0269-8803.18.23.89
- 529 6. Kononowicz TW, van Rijn H. Decoupling Interval Timing and Climbing Neural Activity: A  
530 Dissociation between CNV and N1P2 Amplitudes. *J Neurosci*. 2014;34: 2931–2939.  
531 doi:10.1523/JNEUROSCI.2523-13.2014
- 532 7. Pfeuty M, Ragot R, Pouthas V. Relationship between CNV and timing of an upcoming  
533 event. *Neuroscience Letters*. 2005;382: 106–111. doi:10.1016/j.neulet.2005.02.067
- 534 8. Macar F, Vidal F, Casini L. The supplementary motor area in motor and sensory timing:  
535 evidence from slow brain potential changes. *Exp Brain Res*. 1999;125: 271–280.  
536 doi:10.1007/s002210050683
- 537 9. Trillenber P, Verleger R, Wascher E, Wauschkuhn B, Wessel K. CNV and temporal  
538 uncertainty with ‘ageing’ and ‘non-ageing’ S1–S2 intervals. *Clinical Neurophysiology*.  
539 2000;111: 1216–1226. doi:10.1016/S1388-2457(00)00274-1
- 540 10. Miniussi C, Wilding EL, Coull JT, Nobre AC. Orienting attention in time: Modulation of  
541 brain potentials. *Brain*. 1999;122: 1507–1518. doi:10.1093/brain/122.8.1507
- 542 11. Macar F, Vidal F. The CNV peak: An index of decision making and temporal memory.  
543 *Psychophysiology*. 2003;40: 950–954. doi:10.1111/1469-8986.00113
- 544 12. Praamstra P, Kourtis D, Kwok HF, Oostenveld R. Neurophysiology of Implicit Timing in  
545 Serial Choice Reaction-Time Performance. *J Neurosci*. 2006;26: 5448–5455.  
546 doi:10.1523/JNEUROSCI.0440-06.2006
- 547 13. Macar F, Vidal F. Time processing reflected by EEG surface Laplacians. *Exp Brain Res*.  
548 2002;145: 403–406. doi:10.1007/s00221-002-1103-z
- 549 14. Walter WG, Cooper R, Aldridge VJ, McCallum WC, Winter AL. Contingent Negative  
550 Variation : An Electric Sign of Sensori-Motor Association and Expectancy in the Human  
551 Brain. *Nature*. 1964;203: 380–384. doi:10.1038/203380a0

- 552 15. Wang J, Narain D, Hosseini EA, Jazayeri M. Flexible timing by temporal scaling of  
553 cortical responses. *Nat Neurosci.* 2018;21: 102–110. doi:10.1038/s41593-017-0028-6
- 554 16. Remington ED, Egger SW, Narain D, Wang J, Jazayeri M. A Dynamical Systems  
555 Perspective on Flexible Motor Timing. *Trends in Cognitive Sciences.* 2018;22: 938–952.  
556 doi:10.1016/j.tics.2018.07.010
- 557 17. Vyas S, Golub MD, Sussillo D, Shenoy KV. Computation Through Neural Population  
558 Dynamics. *Annual Review of Neuroscience.* 2020;43: 249–275. doi:10.1146/annurev-  
559 neuro-092619-094115
- 560 18. Sussillo D. Neural circuits as computational dynamical systems. *Current Opinion in*  
561 *Neurobiology.* 2014;25: 156–163. doi:10.1016/j.conb.2014.01.008
- 562 19. Williams AH, Poole B, Maheswaranathan N, Dhawale AK, Fisher T, Wilson CD, et al.  
563 Discovering Precise Temporal Patterns in Large-Scale Neural Recordings through  
564 Robust and Interpretable Time Warping. *Neuron.* 2020;105: 246-259.e8.  
565 doi:10.1016/j.neuron.2019.10.020
- 566 20. O’Connell RG, Shadlen MN, Wong-Lin K, Kelly SP. Bridging Neural and Computational  
567 Viewpoints on Perceptual Decision-Making. *Trends in Neurosciences.* 2018;41: 838–  
568 852. doi:10.1016/j.tins.2018.06.005
- 569 21. Boehm U, van Maanen L, Forstmann B, van Rijn H. Trial-by-trial fluctuations in CNV  
570 amplitude reflect anticipatory adjustment of response caution. *Neuroimage.* 2014;96:  
571 95–105. doi:10.1016/j.neuroimage.2014.03.063
- 572 22. Meck WH. Neuropsychology of timing and time perception. *Brain and Cognition.*  
573 2005;58: 1–8. doi:10.1016/j.bandc.2004.09.004
- 574 23. Luck SJ. A Closer Look at ERPs and ERP Components. Second edition. An introduction to  
575 the event-related potential technique. Second edition. Cambridge, Massachusetts: The  
576 MIT Press; 2014. pp. 35–70.
- 577 24. Smith NJ, Kutas M. Regression-based estimation of ERP waveforms: I. The rERP  
578 framework. *Psychophysiology.* 2015;52: 157–168. doi:10.1111/psyp.12317
- 579 25. Ehinger BV, Dimigen O. Unfold: an integrated toolbox for overlap correction, non-linear  
580 modeling, and regression-based EEG analysis. *PeerJ.* 2019;7: e7838.  
581 doi:10.7717/peerj.7838
- 582 26. Litvak V, Jha A, Flandin G, Friston K. Convolution models for induced electromagnetic  
583 responses. *Neuroimage.* 2013;64: 388–398. doi:10.1016/j.neuroimage.2012.09.014
- 584 27. Lalor EC, Pearlmutter BA, Reilly RB, McDarby G, Foxe JJ. The VESPA: A method for the  
585 rapid estimation of a visual evoked potential. *NeuroImage.* 2006;32: 1549–1561.  
586 doi:10.1016/j.neuroimage.2006.05.054

- 587 28. Crosse MJ, Di Liberto GM, Bednar A, Lalor EC. The Multivariate Temporal Response  
588 Function (mTRF) Toolbox: A MATLAB Toolbox for Relating Neural Signals to Continuous  
589 Stimuli. *Front Hum Neurosci.* 2016;10. doi:10.3389/fnhum.2016.00604
- 590 29. Kristensen E, Guerin-Dugué A, Rivet B. Regularization and a general linear model for  
591 event-related potential estimation. *Behav Res.* 2017;49: 2255–2274.  
592 doi:10.3758/s13428-017-0856-z
- 593 30. Woody CD. Characterization of an adaptive filter for the analysis of variable latency  
594 neuroelectric signals. *Med & Biol Engng.* 1967;5: 539–554. doi:10.1007/BF02474247
- 595 31. Ouyang G, Herzmann G, Zhou C, Sommer W. Residue iteration decomposition (RIDE): A  
596 new method to separate ERP components on the basis of latency variability in single  
597 trials: RIDE: A new method to separate ERP components. *Psychophysiology.* 2011;48:  
598 1631–1647. doi:10.1111/j.1469-8986.2011.01269.x
- 599 32. Lerner Y, Honey CJ, Katkov M, Hasson U. Temporal scaling of neural responses to  
600 compressed and dilated natural speech. *Journal of Neurophysiology.* 2014;111: 2433–  
601 2444. doi:10.1152/jn.00497.2013
- 602 33. Huang H-C, Jansen BH. EEG waveform analysis by means of dynamic time-warping.  
603 *International Journal of Bio-Medical Computing.* 1985;17: 135–144. doi:10.1016/0020-  
604 7101(85)90084-4
- 605 34. Herbst SK, Fiedler L, Obleser J. Tracking Temporal Hazard in the Human  
606 Electroencephalogram Using a Forward Encoding Model. *eNeuro.* 2018;5:  
607 ENEURO.0017-18.2018. doi:10.1523/ENEURO.0017-18.2018
- 608 35. Kulasingham JP, Joshi NH, Rezaeizadeh M, Simon JZ. Cortical Processing of Arithmetic  
609 and Simple Sentences in an Auditory Attention Task. *J Neurosci.* 2021;41: 8023–8039.  
610 doi:10.1523/JNEUROSCI.0269-21.2021
- 611 36. Gonçalves NR, Whelan R, Foxe JJ, Lalor EC. Towards obtaining spatiotemporally precise  
612 responses to continuous sensory stimuli in humans: A general linear modeling  
613 approach to EEG. *NeuroImage.* 2014;97: 196–205.  
614 doi:10.1016/j.neuroimage.2014.04.012
- 615 37. Wiener M, Kanai R. Frequency tuning for temporal perception and prediction. *Current*  
616 *Opinion in Behavioral Sciences.* 2016;8: 1–6. doi:10.1016/j.cobeha.2016.01.001
- 617 38. Herrmann CS, Rach S, Vosskuhl J, Strüber D. Time–Frequency Analysis of Event-Related  
618 Potentials: A Brief Tutorial. *Brain Topogr.* 2014;27: 438–450. doi:10.1007/s10548-013-  
619 0327-5
- 620 39. Breska A, Deouell LY. Neural mechanisms of rhythm-based temporal prediction: Delta  
621 phase-locking reflects temporal predictability but not rhythmic entrainment. *PLOS*  
622 *Biology.* 2017;15: e2001665. doi:10.1371/journal.pbio.2001665

- 623 40. Breska A, Deouell LY. Data from: Neural mechanisms of rhythm-based temporal  
624 prediction: delta phase-locking reflects temporal predictability but not rhythmic  
625 entrainment. 2017. doi:doi:10.5061/dryad.5vb8h
- 626 41. Pisauro MA, Fouragnan E, Retzler C, Piliastides MG. Neural correlates of evidence  
627 accumulation during value-based decisions revealed via simultaneous EEG-fMRI. *Nat*  
628 *Commun.* 2017;8: 1–9. doi:10.1038/ncomms15808
- 629 42. Pisauro MA, Fouragnan E, Retzler C, Piliastides MG. Evidence Accumulation in Value-  
630 Based decisions. 2020. doi:10.18112/openneuro.ds002734.v1.0.2
- 631 43. Krajbich I, Armel C, Rangel A. Visual fixations and the computation and comparison of  
632 value in simple choice. *Nature Neuroscience.* 2011;13: 10.
- 633 44. Luck SJ. An introduction to the event-related potential technique. Second edition.  
634 Cambridge, Massachusetts: The MIT Press; 2014.
- 635 45. Möcks J. The Influence of Latency Jitter in Principal Component Analysis of Event-  
636 Related Potentials. *Psychophysiology.* 1986;23: 480–484. doi:10.1111/j.1469-  
637 8986.1986.tb00659.x
- 638 46. Hunt LT, Behrens TE, Hosokawa T, Wallis JD, Kennerley SW. Capturing the temporal  
639 evolution of choice across prefrontal cortex. Frank MJ, editor. *eLife.* 2015;4: e11945.  
640 doi:10.7554/eLife.11945
- 641 47. Ariely D, Zakay D. A timely account of the role of duration in decision making. *Acta*  
642 *Psychologica.* 2001;108: 187–207. doi:10.1016/S0001-6918(01)00034-8
- 643 48. O’Connell RG, Dockree PM, Kelly SP. A supramodal accumulation-to-bound signal that  
644 determines perceptual decisions in humans. *Nature Neuroscience.* 2012;15: 1729–  
645 1735. doi:10.1038/nn.3248
- 646 49. Kelly SP, O’Connell RG. Internal and External Influences on the Rate of Sensory  
647 Evidence Accumulation in the Human Brain. *Journal of Neuroscience.* 2013;33: 19434–  
648 19441. doi:10.1523/JNEUROSCI.3355-13.2013
- 649 50. Kösem A, Bosker HR, Takashima A, Meyer A, Jensen O, Hagoort P. Neural Entrainment  
650 Determines the Words We Hear. *Current Biology.* 2018;28: 2867–2875.e3.  
651 doi:10.1016/j.cub.2018.07.023
- 652 51. Abrams DA, Nicol T, Zecker S, Kraus N. Abnormal Cortical Processing of the Syllable  
653 Rate of Speech in Poor Readers. *J Neurosci.* 2009;29: 7686–7693.  
654 doi:10.1523/JNEUROSCI.5242-08.2009
- 655 52. Müller JA, Wendt D, Kollmeier B, Debener S, Brand T. Effect of Speech Rate on Neural  
656 Tracking of Speech. *Front Psychol.* 2019;10. doi:10.3389/fpsyg.2019.00449
- 657 53. Allman MJ, Meck WH. Pathophysiological distortions in time perception and timed  
658 performance. *Brain.* 2012;135: 656–677. doi:10.1093/brain/awr210



- 659 54. Smith NJ, Kutas M. Regression-based estimation of ERP waveforms: II. Nonlinear  
660 effects, overlap correction, and practical considerations. *Psychophysiology*. 2015;52:  
661 169–181. doi:10.1111/psyp.12320
- 662 55. Brainard DH. The psychophysics toolbox. *Spatial vision*. 1997;10: 433–436.
- 663 56. Pelli DG. The VideoToolbox software for visual psychophysics: transforming numbers  
664 into movies. *Spatial Vision*. 1997;10: 437–442. doi:10.1163/156856897X00366
- 665 57. Delorme A, Makeig S. EEGLAB: an open source toolbox for analysis of single-trial EEG  
666 dynamics including independent component analysis. *Journal of Neuroscience*  
667 *Methods*. 2004;134: 9–21. doi:10/bqr2f2
- 668 58. Lopez-Calderon J, Luck SJ. ERPLAB: an open-source toolbox for the analysis of event-  
669 related potentials. *Front Hum Neurosci*. 2014;8. doi:10.3389/fnhum.2014.00213
- 670 59. Reichel L, Ye Q. Simple Square Smoothing Regularization Operators. *Electronic*  
671 *Transactions on Numerical Analysis*. 2008;33: 63–83.
- 672 60. Maris E, Oostenveld R. Nonparametric statistical testing of EEG- and MEG-data. *Journal*  
673 *of Neuroscience Methods*. 2007;164: 177–190. doi:10.1016/j.jneumeth.2007.03.024
- 674 61. Cumming G. The New Statistics: Why and How. *Psychological Science*. 2014;25: 7–29.  
675 doi:10.1177/0956797613504966
- 676 62. Olejnik S, Algina J. Generalized eta and omega squared statistics: measures of effect  
677 size for some common research designs. *Psychol Methods*. 2003;8: 434–447.  
678 doi:10.1037/1082-989X.8.4.434
